# Supplementary material for: A computationally efficient depression-filling algorithm for digital elevation models, applied to proglacial lake drainage
Source: Copernicus journal article supplement (doi:10.5194/gmd-9-4451-2016), 2016-12-15
Supplement: Supplementary file 1 [file gmd-9-4451-2016-supplement.zip]

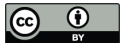

## *Supplement of*

# **A computationally efficient depression-filling algorithm for digital elevation models, applied to proglacial lake drainage**

**Constantijn J. Berends and Roderik S. W. van de Wal**

*Correspondence to:* Constantijn J. Berends (c.j.berends@uu.nl)

- gmd-9-4451-2016-supplement-title-page.pdf
- Demo\_FillLake.m
- Demo\_FillSea.m
- Fill\_1km.m
- Fill\_40km.m
- Fill\_5km.m
- Interpolate\_Input\_Fields.m
- Map\_Stack\_40km\_to\_1km.m
- Map\_Stack\_40km\_to\_5km.m
- Map\_Stack\_5km\_to\_1km.m
- ReadMe.txt
- ShowMap.m

The copyright of individual parts of the supplement might differ from the CC-BY 3.0 licence.
